# Supplementary material
Source: publisher figshare collection journal article supplement (https://acs.figshare.com/ndownloader/files/7648000)
Supplement: Supplementary file 1 [file 7648000]

## Designing Block Copolymer Architectures toward Tough Bioplastics from Natural Rosin

Md Anisur Rahman, Hasala N. Lokupitiya, Mitra S. Ganewatta, Liang Yuan, Morgan Stefik and Chuanbing Tang\*

Department of Chemistry and Biochemistry, University of South Carolina, Columbia, South Carolina 29208, USA

CORRESPONDING AUTHORS: [tang4@mailbox.sc.edu](mailto:tang4@mailbox.sc.edu)

### Supporting Information

**Scheme S1.** Synthesis of homopolymer by ROMP.

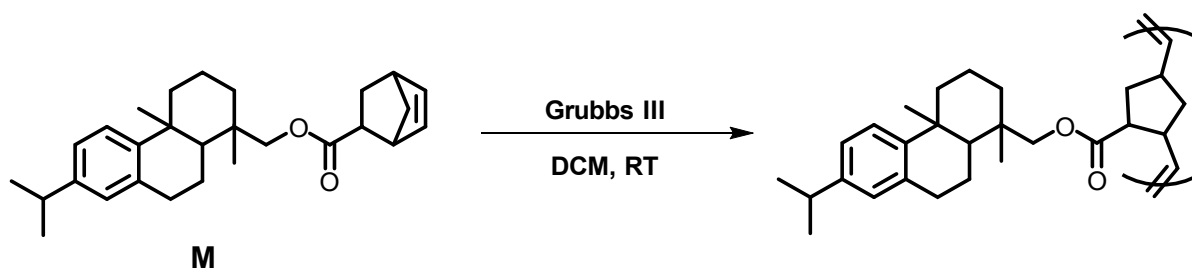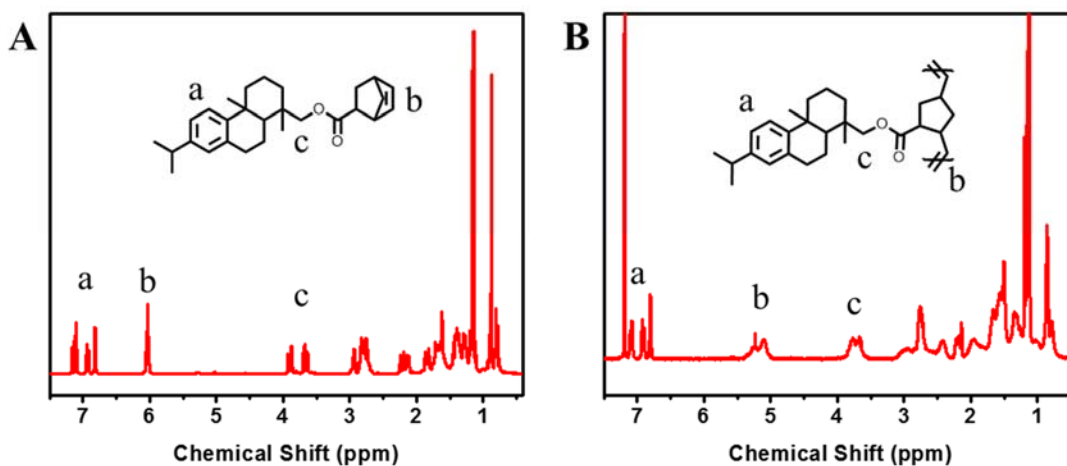

**Figure S1.**  $^1\text{H}$  NMR spectra of (A) Monomer (**M**); (B) Homopolymer.

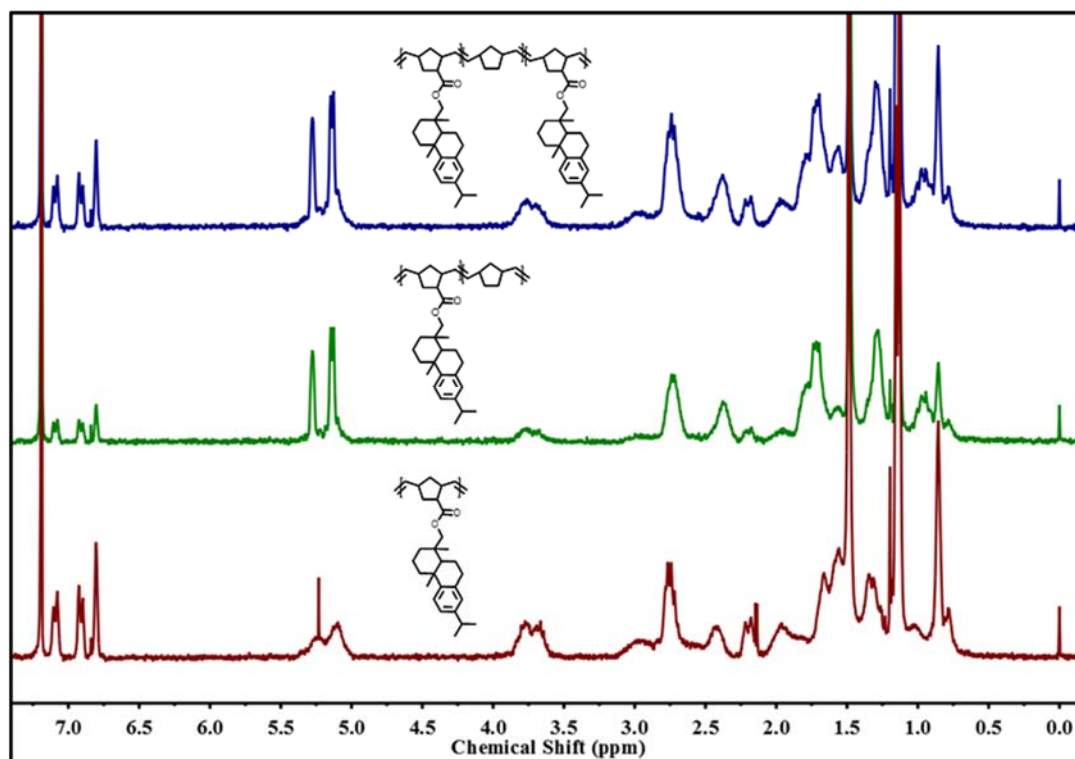

**Figure S2.**  $^1\text{H}$  NMR spectra of polymers from each step in synthesis of triblock copolymers.

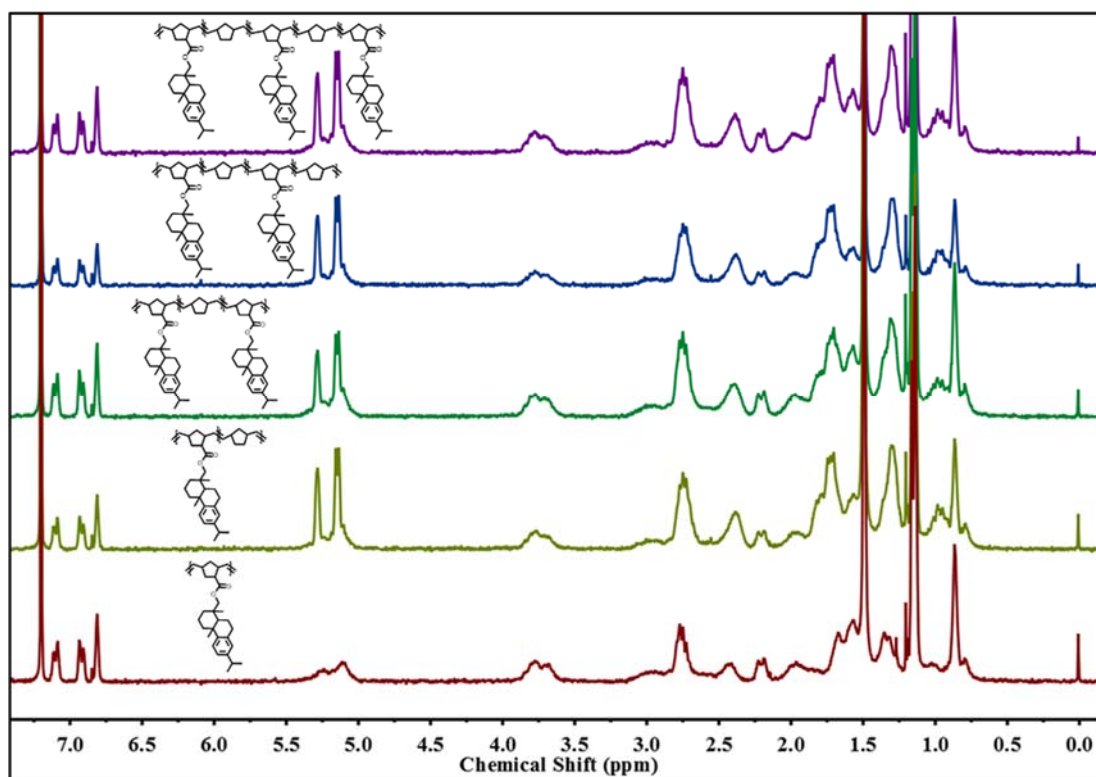

**Figure S3.**  $^1\text{H}$  NMR spectra of polymers from each step in synthesis of pentablock copolymers.

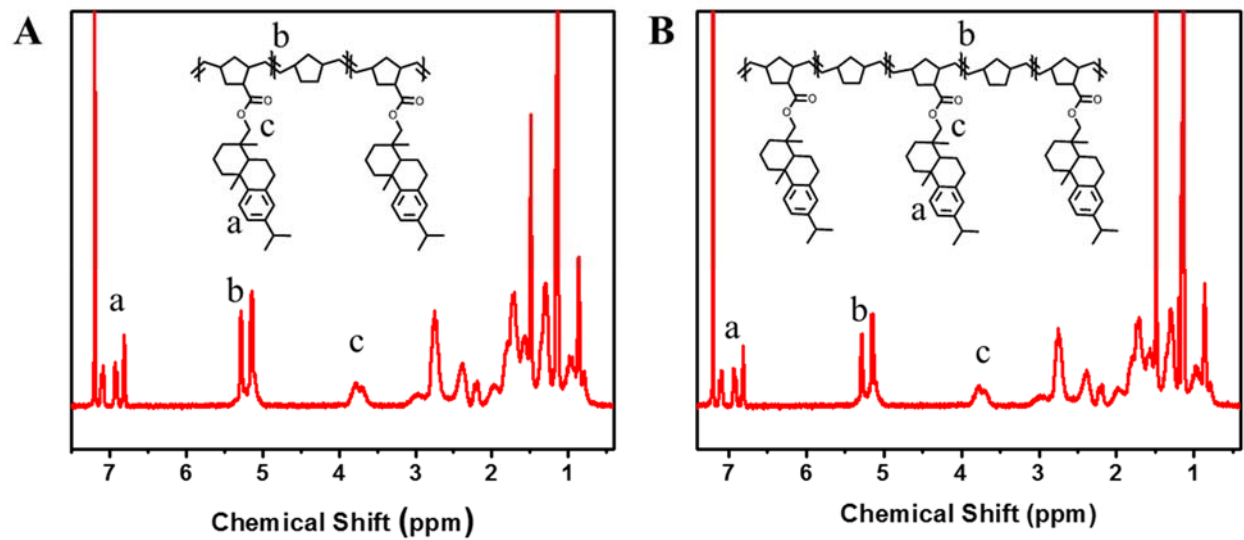

**Figure S4.**  $^1\text{H}$  NMR spectra of (A) Triblock copolymer; (B) Pentablock copolymers.

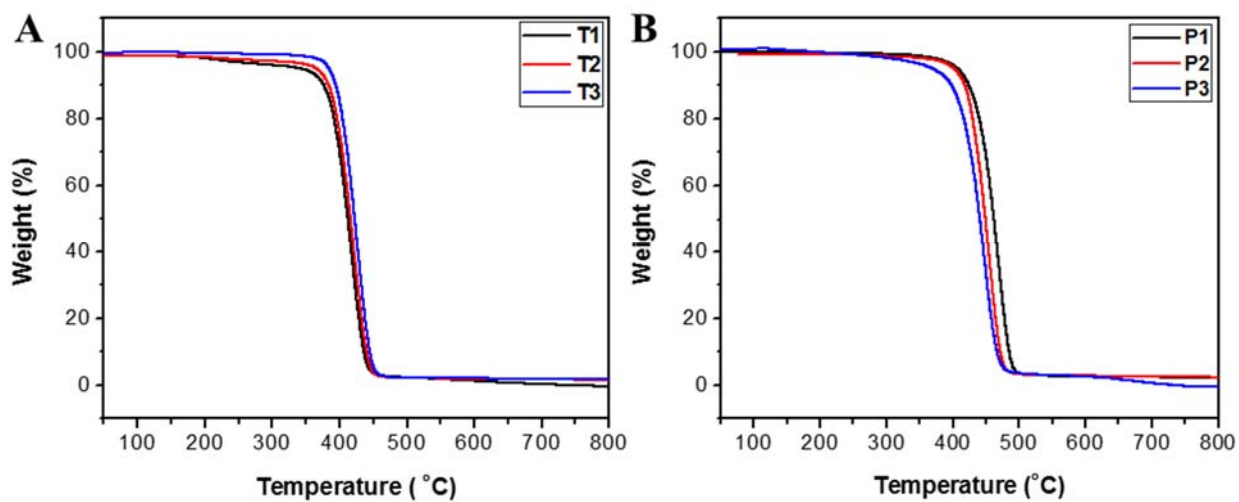

**Figure S5.** TGA curves of (A) Triblock copolymers T1, T2, and T3; and (B) Pentablock copolymers P1, P2, and P3.

**Table S1.** SAXS results of all tri and pentablock copolymers.

| Polymer   | $f_{\text{Rosin}}$<br>(Theo) | $q^*$<br>(nm <sup>-1</sup> ) | $D$<br>( $2\pi/q^*$ )<br>(nm) | $q_1$<br>(nm <sup>-1</sup> ) | $q / q^*$ |
|-----------|------------------------------|------------------------------|-------------------------------|------------------------------|-----------|
| <b>T1</b> | 0.78                         | 0.15                         | 42                            | 0.30                         | 1, 2      |
| <b>T2</b> | 0.68                         | 0.14                         | 45                            | 0.28                         | 1, 2      |
| <b>T3</b> | 0.63                         | 0.13                         | 48                            | 0.26                         | 1, 2      |
| <b>P1</b> | 0.78                         | 0.11                         | 57                            | 0.22                         | 1, 2      |
| <b>P2</b> | 0.68                         | 0.11                         | 57                            | 0.22                         | 1, 2      |
| <b>P3</b> | 0.63                         | 0.09                         | 70                            | 0.17                         | 1, 2      |

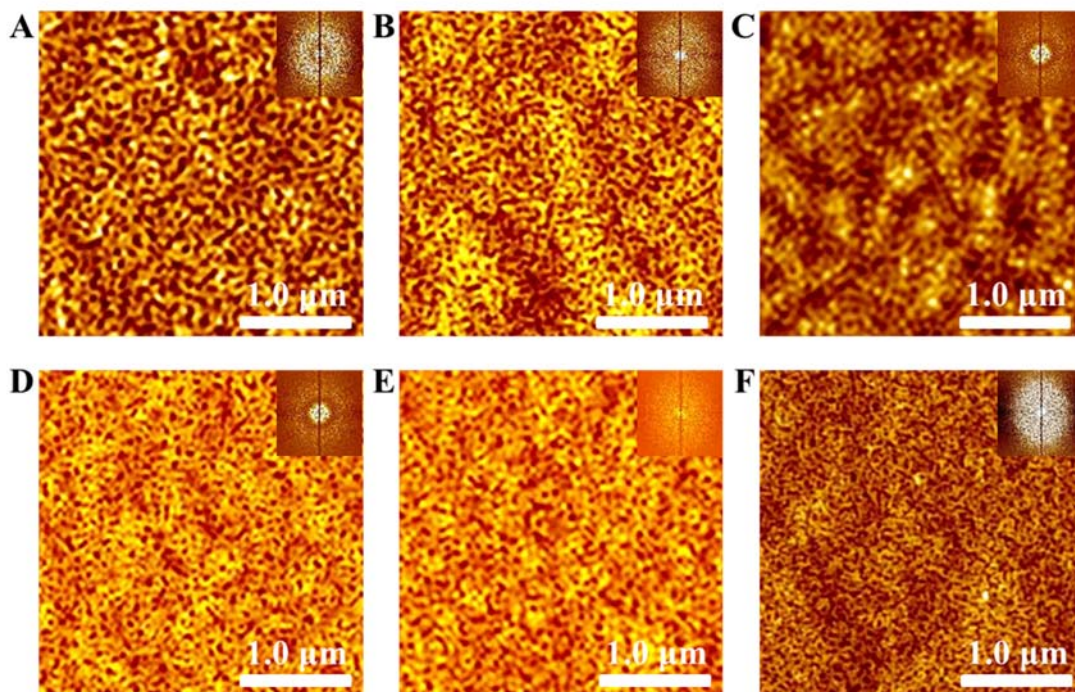

**Figure S6.** AFM height images of thin films of (A) **P1**; (B) **P2**; (C) **P3**; (D) **T1**; (E) **T2**; (F) **T3** prepared immediately after spin coating. FFTs of each image are shown in the insets.

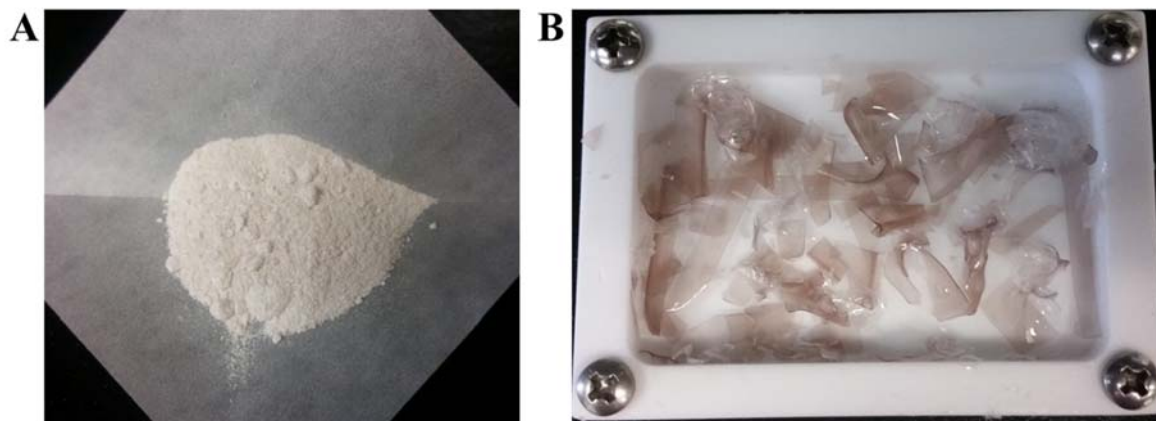

**Figure S7.** Images of H1 polymer: (A) powder and (B) brittle films.

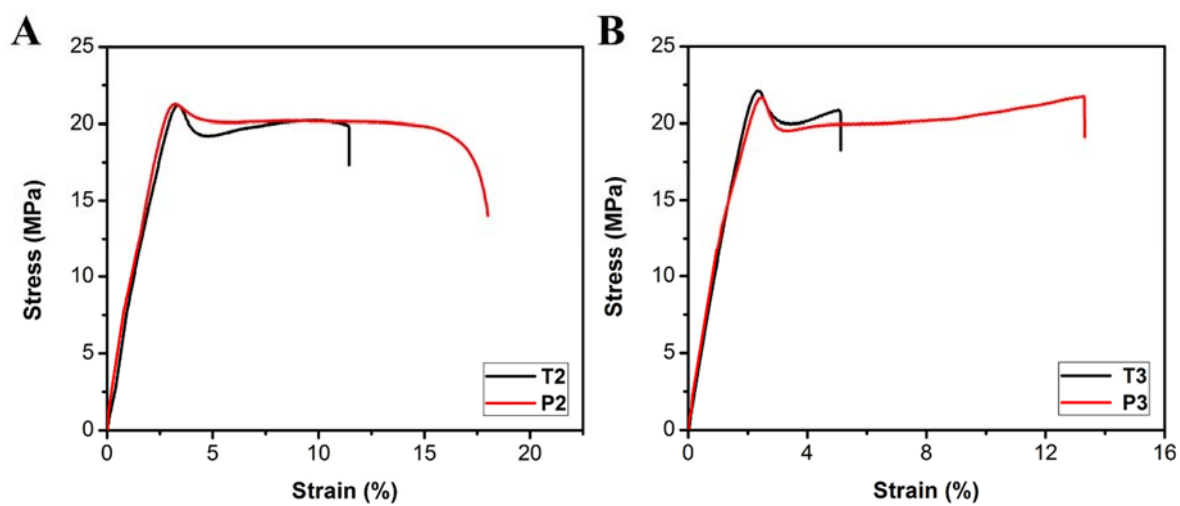

**Figure S8.** Uniaxial stress-strain curves for the (A) T2 and P2; (B) T3 and P3.
